# Supplementary material for: Flexible grid-mesh electrodes fabricated by electroless copper plating on corona-treated PET substrates and coating with graphene for transparent film heaters
Source: Royal Society of Chemistry journal article supplement (doi:10.1039/c7ra09921e), 2017-01-01
Supplement: c7ra09921e1.pdf [file c7ra09921e1.pdf]

## Supporting Figures

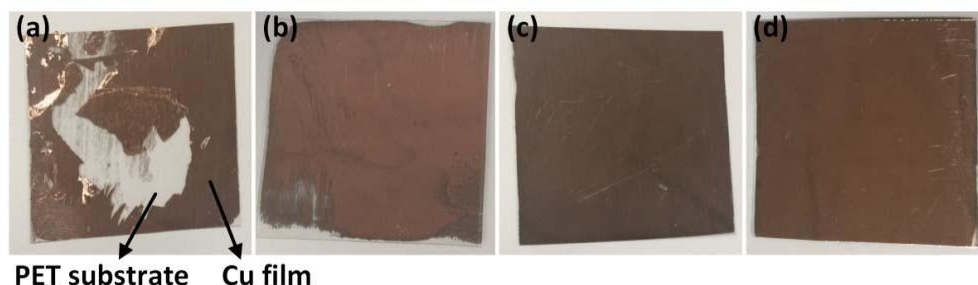

**Fig. S1** The photos of Cu films deposited on PET substrates via electroless plating as a function of the number of corona treatment on the PET substrates, such as (a) non-treated, (b) once treated, (c) 5-times treated, and (d) 10-times treated.

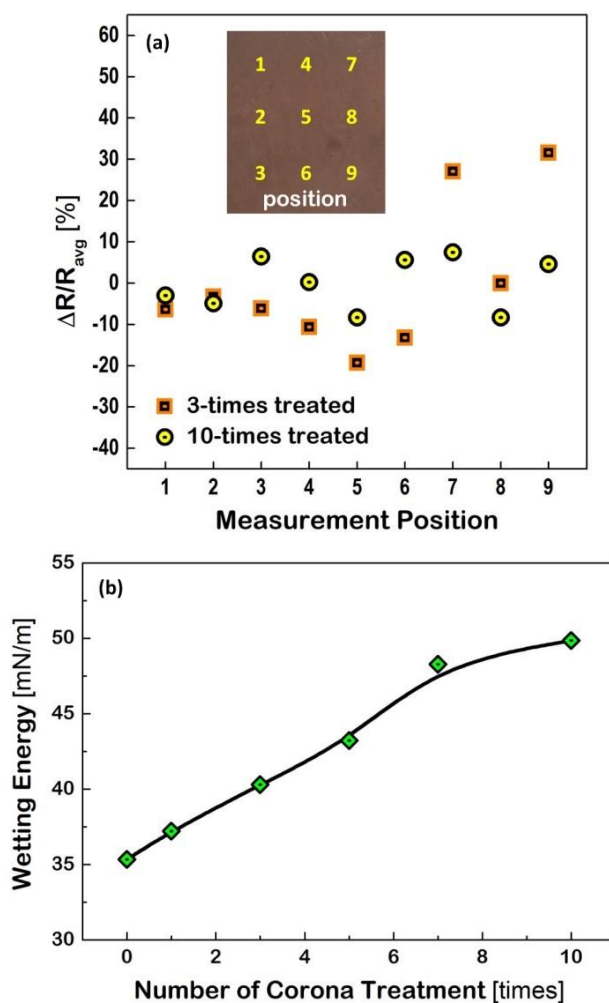

**Fig. S2** (a) The variations in the sheet resistance of the Cu film deposited on the PET substrates according to the measurement positions (1-9). (b) The wetting energy of the PET substrates as a function of the number of corona treatment.

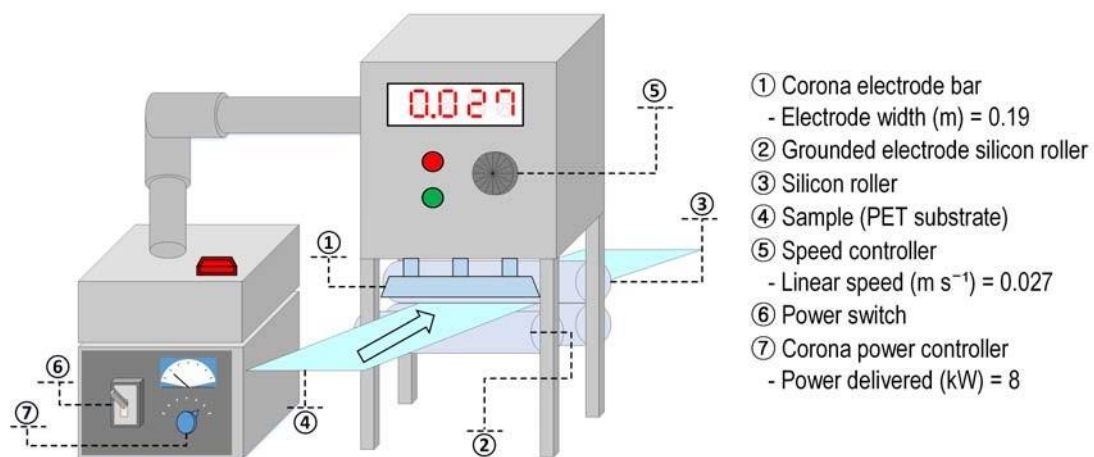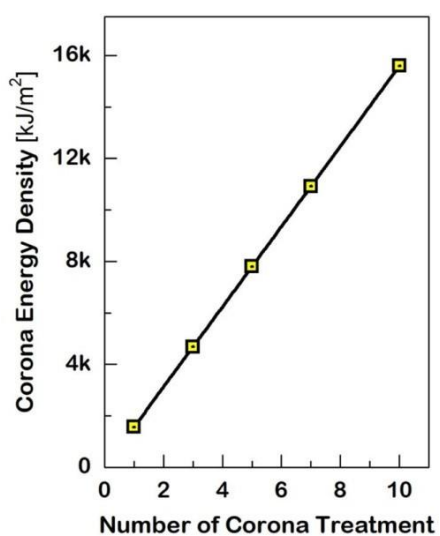

**Fig. S3** (Top) The schematic of the corona treatment system used in this study and (bottom) the estimated corona energy density as a function of the number of corona treatment.
